# Supplementary material for: Parents’ Participation in Care during Neonatal Intensive Care Unit Stay in COVID-19 Era: A Quantitative Observational Study
Source: Preprints.org preprint supplement (doi:10.20944/preprints202403.0507.v1), 2024-03-08
Supplement: Supplementary file 2 [file supplementary]

| **N.** | **ITEM** | **1 = mai** | **2 = a volte** | **3 = sempre** |
| --- | --- | --- | --- | --- |
| 1 | il genitore comunica con il personale sanitario |  |  |  |
| 2 | il genitore pone domande riguardo l'assistenza ed il trattamento di suo/a figlio/a |  |  |  |
| 3 | il genitore è disponibile a partecipare ad addestramenti erogati nella Terapia Intensiva Neonatale |  |  |  |
| 4 | il genitore desidera visitare il/la proprio/a figlio/a |  |  |  |
| 5 | il genitore desidera avere contatto fisico con il/la figlio/a (accarezzare, tenere le mani, ecc.) |  |  |  |
| 6 | il genitore usa termini affettivi con suo/a figlio/a |  |  |  |
| 7 | il genitore desidera tenere in braccio il/la figlio/a |  |  |  |
| 8 | il genitore prova a calmare il/la proprio/a figlio/a (cullandolo, cantando, ecc.) |  |  |  |
| 9 | il genitore è attento a posizionare il/la figlio/a in una posizione comoda e consona |  |  |  |
| 10 | il genitore partecipa all' alimentazione del figlio/a |  |  |  |
| 11a | la mamma è disposta ad allattare al seno |  |  |  |
| 11b | il papà supporta la mamma affinché il figlio/a riceva latte materno |  |  |  |
| 12 | il genitore partecipa alle cure igieniche del figlio/a |  |  |  |
| 13 | il genitore si accorge di qualsiasi peggioramento nelle condizioni generali del figlio/a |  |  |  |
| 14 | il genitore desidera eseguire il contatto pelle a pelle o desidera partecipare alla kangaroo care con suo figlio/a |  |  |  |
| 15 | il genitore supporta suo figlio/a durante procedure dolorose |  |  |  |
| 16 | il genitore esterna le proprie emozioni e i propri pensieri |  |  |  |
|  | **PUNTEGGIO TOTALE** |  | | |

Italian version of the scale ‘Parental Participation in Care: Neonatal Intensive Care Unit (PPCS: NICU)”
